# Supplementary material for: Association of TNF-αwith Impaired Migration Capacity of Mesenchymal Stem Cells in Patients with Systemic Lupus Erythematosus
Source: Hindawi journal article supplement (doi:10.1155/2014/169082), 2014-01-01
Supplement: f1 [file 169082.f1.pdf]

Supplementary Figure 1.

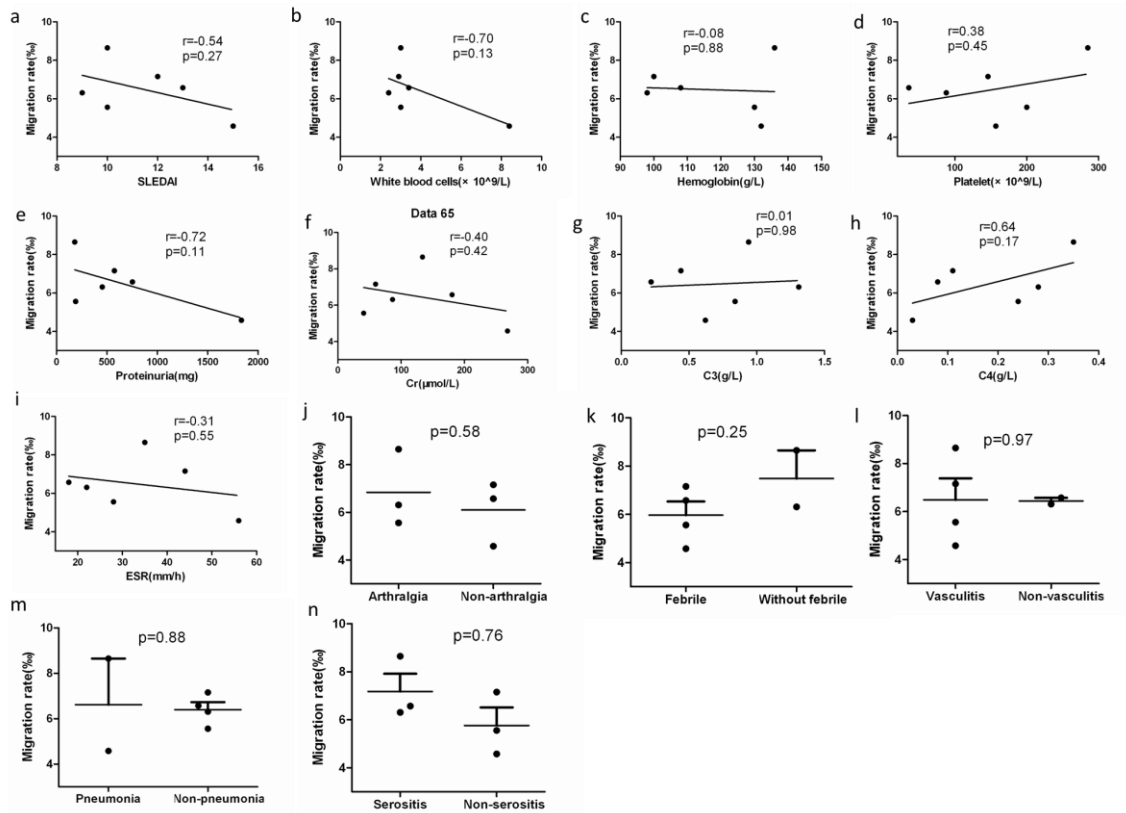

Supplementary Figure 1. Associations of the migration rate with clinical manifestations: a. SLEDAI score, b. white blood cells, c. hemoglobin, d. platelet, e. urine protein, f. serum creatinine, g. complement 3, h. complement 4, i. ESR, j. arthralgia, k. febrile, l. vasculitis, m. pneumonia, n. serositis.

Supplementary Figure 2.

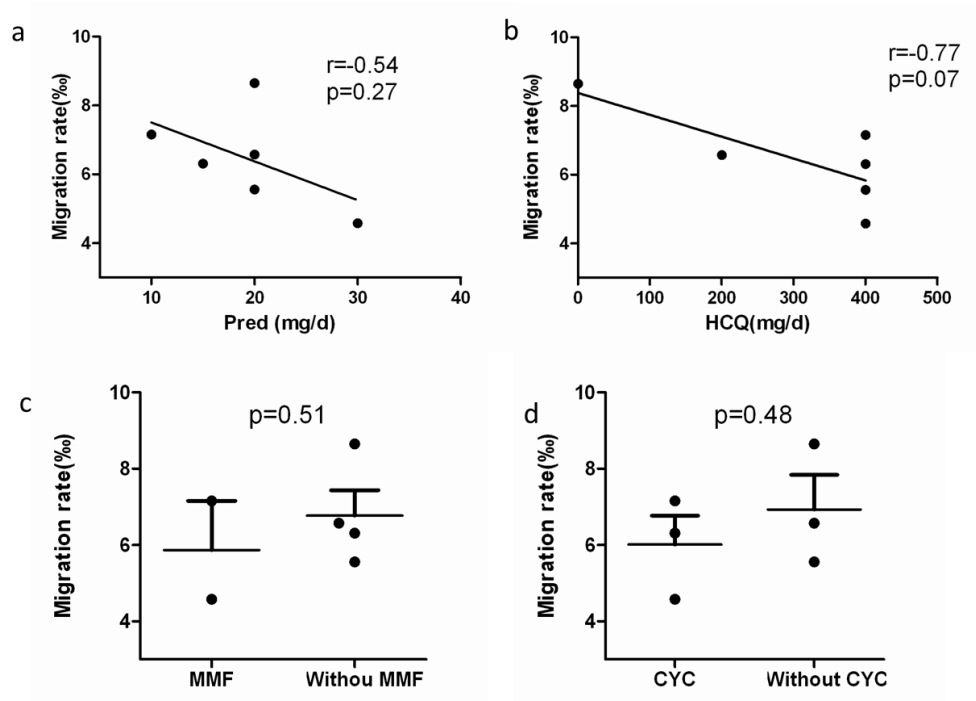

Supplementary Figure 2. Associations of the migration rate with various treatment drugs. a. Pred, b. HCQ, c. MMF, d. CYC.
